# Supplementary material for: Clinical efficacy and safety of Capilliposide for cervical intraepithelial neoplasia with HR-HPV infection: a prospective, multicentre, single arm study
Source: Research Square preprint supplement (doi:10.21203/rs.3.rs-6110721/v1), 2025-04-10
Supplement: Supplementary file 1 [file 78e990412db18741c0be8303.docx]

**Table 1 Characteristics of evaluable participants on baseline.**

| **Characteristics** | | **n** | **%** |
| --- | --- | --- | --- |
| Age, years | <40 | 28 | 41.7 |
| ≥40 | 39 | 58.2 |
| Education | Primary school | 11 | 16.4 |
| Unior high school | 20 | 29.8 |
| Senior high school | 12 | 17.9 |
| University and above | 24 | 35.8 |
| Menstrual history | Premenopause | 47 | 70.1 |
| Pausimenia | 20 | 29.8 |
| Smoking status | No | 67 | 100 |
| Yes | 0 | 0 |
| Drinking History | No | 62 | 92.5 |
| Yes | 5 | 7.4 |
| Past History | Hypertension | 4 | 5.9 |
| No | 63 | 94 |
| Previous HPV vaccine | No | 55 | 82 |
| Yes | 12 | 17.9 |
| TCT | NILM,ASCUS or LSIL | 62 | 92.5 |
| ASC-H or HSIL | 5 | 7.5 |
| Histology | CIN 1 | 61 | 91 |
| CIN 2/3 | 6 | 9 |
| HR-HPV | 16、Others (+) | 11 | 16.4 |
| 18、Others (+) | 5 | 7.5 |
| Other high-risk HPV (+) | 51 | 76.1 |
| Persistent HR-HPV | No | 27 | 40.2 |
| Yes | 27 | 40.2 |
| Not detailed | 13 | 19.4 |

**Table 2 Histology results of baseline status and after CVG treatment**

| **Baseline Status** | | **After CVG treatment** | |
| --- | --- | --- | --- |
| **Cervical histology** | **N** | **Cervical histology** | **N** |
| CIN 1 | 61 | Complete regression | 6 |
| LSIL | 4 |
| HSIL | 0 |
| NO pathological results | 51 |
| CIN 2/3 | 6 | Complete regression | 1 |
| LSIL | 0 |
| HSIL | 2 |
| NO pathological results | 3 |

**Table 3 TCT results of baseline status and after CVG treatment.**

| **Baseline Status** | | **After CVG treatment** | |
| --- | --- | --- | --- |
| **TCT results** | **N** | **TCT result** | **N** |
| NILM | 22 | NILM | 18 |
| ASC-H | 0 |
| ASC-US | 2 |
| LSIL | 1 |
| HSIL | 0 |
| ASC-US | 18 | NILM | 15 |
| ASC-H | 0 |
| ASC-US | 1 |
| LSIL | 2 |
| HSIL | 0 |
| LSIL | 22 | NILM | 17 |
| ASC-H | 0 |
| ASC-US | 3 |
| LSIL | 2 |
| HSIL | 0 |
| ASC-H | 2 | NILM | 2 |
| ASC-H | 0 |
| ASC-US | 0 |
| LSIL | 0 |
| HSIL | 0 |
| HSIL | 3 | NILM | 2 |
| ASC-H | 1 |
| ASC-US | 0 |
| LSIL | 0 |
| HSIL | 0 |

**Table 4 HPV status after CVG treatment.**

| **Characteristics** | **%** |
| --- | --- |
| Clearance | 23/67 (34.3%) |
| Persistence | 23/67 (34.3%) |
| Progression | 3/67 (4.4%) |
| Overall response | 41/67（61%） |
| Clearance of HPV 16 positive | 8/11 (72%) |
| Clearance of HPV 18 positive | 3/5 (60%) |

**Table 5 Side effects of CVG treatment.**

| **Adverse reactions** | **N** |
| --- | --- |
| Systemic symptoms | **0** |
| Vaginal pruritus | **7** |
| Vaginal pain | **3** |
| Vaginal discharge | **2** |
| Vaginal bleeding | **13** |
| Ulceration of the treatment site | **0** |
| Pelvic pain | **1** |
