# Supplementary material for: Clinical efficacy and safety of Capilliposide for cervical intraepithelial neoplasia with HR-HPV infection: a prospective, multicentre, single arm study
Source: Research Square preprint supplement (doi:10.21203/rs.3.rs-6110721/v1), 2025-04-10
Supplement: Supplementary file 2 [file 849b5aeb52dd68eb4ec782cb.xlsx]

## Sheet: Sheet1
ID	Age（y）	Height（cm）	Weight（kg）	Smoke(1，Yes；0，No）	Drinking(1，Yes；0，No）	Number of pregnancies	Number of births	Number of abortions	Menopause(1，Yes；0，No）	Education level (1,Primary School ；2, Middle School ；3,High school ； 4， College)	Whether to get the HPV vaccine(1，Yes；0，No）	HPV course (1,first time ； 2, lasting more than 1 year ；0，unknown ）	Pre-treatment HPV results	Pre-treatment TCT results	Pre-treatment pathology results	After-treatment HPV results	After-treatment TCT results	After-treatment pathology results	治疗后病理
1	45	151	60	0	1	6	2	4	0	2	0	2	52、53	ASC-US	LSIL	53	NILM	/	/
2	45	160	55	0	0	2	2	0	1	1	0	2	53、16、33	LSIL	LSIL	53.58	NILM	/	/
3	30	163	51	0	0	2	1	1	0	2	0	1	42、31、58	NILM	LSIL	42.58	NILM	negtive result	NILM
4	45	162	52	0	0	1	1	0	1	4	0	1	51	ASC-US	LSIL	negtive result	NILM	/	/
5	34	164	55	0	0	1	1	0	0	4	0	1	66	LSIL	LSIL	negtive result	NILM	/	/
6	31	158	65	0	1	1	1	0	0	3	0	0	18	NILM	LSIL	52	NILM	/	/
7	58	150	58	0	0	2	1	1	1	1	0	2	16、39	ASC-US	LSIL	16	NILM	/	/
8	44	168	63	0	0	2	1	1	0	4	1	2	16	NILM	LSIL	negtive result	NILM	/	/
9	45	155	47.5	0	0	2	1	1	0	1	0	0	81、68	NILM	LSIL	81、68	NILM	/	/
10	74	160	75	0	0	3	3	0	1	1	0	2	66	ASC-US	LSIL	66	NILM	/	/
11	53	165	60	0	0	2	2	0	0	3	0	0	52	NILM	LSIL	52.68	NILM	/	/
12	42	162	57.5	0	0	1	1	0	0	4	1	0	52	ASC-US	LSIL	negtive result	NILM	/	/
13	64	158	53	0	0	2	1	1	1	2	0	0	51	ASC-US	LSIL	negtive result	NILM	/	/
14	63	158	42.5	0	0	2	2	0	1	2	0	0	16、52	ASC-US	LSIL	negtive result	NILM	/	/
15	40	154	42	0	0	2	2	0	0	4	0	2	66	LSIL	LSIL	negtive result	NILM	/	/
16	59	162	58	0	0	1	1	0	1	4	0	1	18、31、58、52	ASC-H	LSIL	18、52	NILM	/	/
17	40	157	55	0	0	1	1	0	0	4	0	2	18	NILM	LSIL	negtive result	NILM	/	/
18	60	158	59	0	0	2	2	0	0	2	0	1	33、53	ASC-US	LSIL	53	NILM	/	/
19	45	160	50	0	0	1	1	0	0	4	1	2	51	NILM	CINII级	negtive result	NILM	/	/
20	54	164	58	0	0	2	2	0	0	2	0	1	53	LSIL	LSIL	53	NILM	/	/
21	37	160	60	0	0	1	1	0	0	2	0	2	33	NILM	LSIL	33	NILM	/	/
22	32	160	49	0	0	0	0	0	0	4	0	2	51、52	HSIL	HSIL/CINIII	16	ASC-H	HSIL/CIN Ⅱ-Ⅲ 级	HSIL
23	53	160	59	0	0	1	1	0	1	2	0	1	31	HSIL/CINII	HSIL	negtive result	NILM	/	/
24	69	152	50	0	0	1	1	0	1	2	0	1	16,33,56	LSIL	LSIL	16,33,56	NILM	/	/
25	61	160	72.5	0	0	1	1	0	1	4	0	2	33、58	NILM	LSIL	58	NILM	/	/
26	64	148	42	0	0	1	1	0	1	1	0	2	81、39、42	ASC-US	LSIL	81、39、42	ASC-US	negtive result	NILM
27	62	159	61.5	0	0	2	2	0	1	1	0	2	53,42	LSIL	LSIL	53,42	NILM	/	/
28	39	166	68	0	0	1	1	0	1	4	0	1	52.58	NILM	LSIL	58	NILM	/	/
29	38	154	55	0	0	3	2	1	0	2	1	2	51+	LSIL	LSIL	negtive result	NILM	/	/
30	57	160	58	0	0	4	1	3	1	1	0	2	06、81+	ASC-US	LSIL	6、16、53、66、81+	LSIL	negtive result	NILM
31	21	160	55	0	0	2	1	1	0	3	0	1	58+	ASC-US	LSIL	negtive result	NILM	/	/
32	46	154	56	0	0	5	4	1	0	2	1	2	52+	LSIL	LSIL	negtive result	NILM	/	/
33	45	155	50	0	0	3	2	1	0	4	0	2	16+	LSIL	CINII	negtive result	NILM	/	/
34	27	174	65	0	0	2	0	2	0	4	1	2	58+	LSIL	CINII	58+	NILM	negtive result	NILM
35	44	160	75	0	0	5	3	2	0	4	0	2	52+	ASC-US	LSIL	44+	NILM	/	/
36	33	163	55	0	0	3	1	2	0	2	0	1	16+	NILM	LSIL	58+	NILM	/	/
37	38	163	63	0	0	3	2	1	0	1	0	1	16、58+	NILM	LSIL	16、58+	NILM	negtive result	LSIL
38	39	162	55	0	0	1	1	0	0	4	1	2	44、31+	LSIL/HSIL	LSIL	negtive result	NILM	/	/
39	40	170	63	0	0	3	1	2	0	2	0	1	58+	NILM	LSIL	58+	ASC-US	LSIL	LSIL
40	59	164	70	0	0	4	2	2	1	2	0	2	61、52+	LSIL	LSIL	negtive result	NILM	/	/
41	22	158	51.5	0	0	0	0	0	0	4	0	1	16、31+	NILM	LSIL	66、31+	NILM	/	/
42	35	163	55.5	0	0	4	2	2	0	2	0	2	66+	ASC-US	LSIL	81+	NILM	/	/
43	50	160	65	0	0	4	2	2	1	2	0	1	58+	LSIL	CINII	58+	LSIL	LSIL、CINII	HSIL
44	54	158	64	0	0	1	1	0	1	1	0	2	43+	LSIL	LSIL	43+	ASC-US	negtive result	NILM
45	48	158	54	0	0	3	0	3	0	4	0	2	56、61+	LSIL	LSIL	61+	NILM	/	/
46	31	155	53	0	0	0	0	0	0	3	0	1	39、52+	LSIL	LSIL	negtive result	NILM	/	/
47	25	160	52.5	0	0	4	0	0	0	3	0	1	53、68+	LSIL	LSIL	negtive result	NILM	/	/
48	27	160	51	0	0	3	0	3	0	2	0	2	31+	ASC-H	LSIL	61+	NILM	/	/
49	38	162	56	0	0	3	1	2	0	4	1	1	18+	NILM	LSIL	negtive result	NILM	/	/
50	24	173	65	0	0	2	0	2	0	3	1	1	82+	NILM	LSIL	negtive result	NILM	/	/
51	38	160	60	0	0	3	2	1	0	3	0	1	58+	ASC-US	LSIL	58+	NILM	LSIL	LSIL
52	30	157	50	0	0	0	0	1	0	3	0	1	52、73、42+	ASC-US	LSIL	59+	LSIL	LSIL	LSIL
53	48	155	58	0	0	3	2	1	1	3	0	2	61、52+	LSIL	LSIL	52+	ASC-US	negtive result	NILM
54	42	158	70	0	0	4	2	2	0	1	0	1	26+	ASC-US	LSIL	33+	NILM	/	/
55	34	165	56	0	0	0	0	0	0	4	0	0	E6E7+	LSIL	LSIL	negtive result	NILM	/	/
56	34	168	66	0	0	0	0	0	0	4	0	0	52、58、59+	NILM	LSIL	52、58、39+	LSIL	/	/
57	44	160	51	0	0	2	0	2	0	4	0	0	59+	NILM	LSIL	59+	ASC-US	negtive result	NILM
58	57	160	65	0	0	1	1	0	0	3	0	0	52、83、53、81+	LSIL	LSIL	52、83、53、81+	LSIL	/	/
59	46	164	70	0	0	1	1	0	0	2	0	0	66+	LSIL	LSIL	66+	ASC-US	/	/
60	38	157	55.5	0	0	1	1	0	0	1	0	0	52	NILM	LSIL	52	NILM	/	/
61	59	158	65	0	0	1	1	0	0	2	0	0	35、58、68	ASC-US	LSIL	16、35、58、68	NILM	/	/
62	30	158	51	0	0	2	2	0	0	4	1	1	81、31	NILM	LSIL	negtive result	NILM	/	/
63	35	169	64	0	1	1	1	0	0	4	0	1	18	NILM	LSIL	18	NILM	/	/
64	57	153	62.5	0	1	2	2	0	1	3	0	2	81、56	LSIL	LSIL	81	NILM	/	/
65	31	160	50	0	1	1	1	0	0	3	1	1	16,35,58	LSIL	LSIL	42、66	NILM	/	/
66	33	162	56	0	0	1	1	0	0	4	1	1	52	NILM	LSIL	negtive result	NILM	/	/
67	56	150	74	0	0	1	1	0	1	2	0	1	16、56	ASC-US	LSIL	56	NILM	/	/
